# Supplementary material for: Effect of conservation farming and biochar addition on soil organic carbon quality, nitrogen mineralization, and crop productivity in a light textured Acrisol in the sub-humid tropics
Source: PLoS One. 2020 Feb 6;15(2):e0228717. doi: 10.1371/journal.pone.0228717 (PMC7004324; doi:10.1371/journal.pone.0228717)
Supplement: S2 File — The soya biomass is found in the sheet “ORG-Soya” and maize biomass in 2016 and 2018 is found in the sheet “ORG-Maize”. (XLSX) [file pone.0228717.s005.xlsx]

## Sheet: ORG-Soya
Lab_ID	InBasin.vs.OUTBasin	Site	Block	Plott	CF_conv	BC_no_BC	Treatment_description_1	What	Extraneous_matter_kg	Grains_kg	Raw_tot_biomass_kg	Extraneous_matter_ton_ha	Grains_ton_ha	Tot_biomass_ton_ha	Harvest index
NMBU	In	Mkushi	1	1	CF	No_BC	CF normal	Soya	3.9425	4.784	8.7265	2.28172	2.76874	5.05046	0.548215
NMBU	In	Mkushi	1	2	CF	BC	CF (NOB) + 4t/ha PP BC	Soya	3.705	4.7689	8.4739	2.14427	2.76	4.90427	0.562775
NMBU	In	Mkushi	1	4	CF	No_BC	CF no residue	Soya	5.985	6.2505	12.2355	3.46382	3.61748	7.0813	0.51085
NMBU	In	Mkushi	1	8	conv	No_BC	Conventional	Soya	2.7075	3.2873	5.9948	1.56697	1.90252	3.46949	0.548359
NMBU	In	Mkushi	2	12	CF	No_BC	CF no residue	Soya	6.0325	7.0839	13.1164	3.49131	4.09981	7.59112	0.54008
NMBU	In	Mkushi	2	13	CF	No_BC	CF normal	Soya	6.5075	6.945	13.4525	3.76622	4.01942	7.78563	0.516261
NMBU	In	Mkushi	2	15	CF	BC	CF (NOB) + 4t/ha PP BC	Soya	5.4625	6.019	11.4815	3.16142	3.4835	6.64492	0.524235
NMBU	In	Mkushi	2	19	conv	No_BC	Conventional	Soya	2.4225	2.4539	4.8764	1.40202	1.42019	2.82222	0.50322
NMBU	In	Mkushi	3	24	CF	BC	CF (NOB) + 4t/ha PP BC	Soya	4.56	5.7412	10.3012	2.6391	3.32272	5.96182	0.557333
NMBU	In	Mkushi	3	26	CF	No_BC	CF normal	Soya	4.94	5.7412	10.6812	2.85902	3.32272	6.18174	0.537505
NMBU	In	Mkushi	3	27	conv	No_BC	Conventional	Soya	3.705	4.5837	8.2887	2.14427	2.65282	4.79709	0.553006
NMBU	In	Mkushi	3	28	CF	No_BC	CF no residue	Soya	4.37	5.3245	9.6945	2.52914	3.08155	5.61069	0.549229
NMBU	In	Mkushi	4	36	conv	No_BC	Conventional	Soya	4.2275	4.4911	8.7186	2.44667	2.59922	5.04589	0.515117
NMBU	In	Mkushi	4	41	CF	No_BC	CF normal	Soya	4.7025	5.8338	10.5363	2.72157	3.37631	6.09788	0.553686
NMBU	In	Mkushi	4	42	CF	No_BC	CF no residue	Soya	5.32	6.1579	11.4779	3.07895	3.56388	6.64283	0.536501
NMBU	In	Mkushi	4	44	CF	BC	CF (NOB) + 4t/ha PP BC	Soya	3.42	4.3985	7.8185	1.97932	2.54563	4.52496	0.562576

## Sheet: ORG-Maize
Year	InBasin.vs.OUTBasin	Site	Block	Plott	CF_conv	BC_no_BC	Treatment_description_1	What	Stover_ton_ha	Cobs_ton_ha	Tot_biomass_ton_ha	Grains_ton_ha
2016	In	Mkushi	1	1	CF	No_BC	CF normal	Maize	4.25224	5.04547	9.29771	4.2715
2016	In	Mkushi	1	2	CF	BC	CF (NOB) + 4t/ha PP BC	Maize	4.59729	5.37115	9.96845	4.19949
2016	In	Mkushi	1	4	CF	No_BC	CF no residue	Maize	6.77556	8.20913	14.9847	6.74884
2016	In	Mkushi	1	8	conv	No_BC	Conventional	Maize	3.47921	4.97036	8.44957	4.06537
2016	In	Mkushi	2	12	CF	No_BC	CF no residue	Maize	5.31962	6.45087	11.7705	5.10871
2016	In	Mkushi	2	13	CF	No_BC	CF normal	Maize	4.10978	5.20031	9.3101	4.04369
2016	In	Mkushi	2	15	CF	BC	CF (NOB) + 4t/ha PP BC	Maize	5.80646	7.39636	13.2028	6.15828
2016	In	Mkushi	2	19	conv	No_BC	Conventional	Maize	3.29809	4.82301	8.1211	3.91139
2016	In	Mkushi	3	24	CF	BC	CF (NOB) + 4t/ha PP BC	Maize	4.80675	6.26452	11.0713	4.88328
2016	In	Mkushi	3	26	CF	No_BC	CF normal	Maize	4.7357	8.06618	12.8019	6.5821
2016	In	Mkushi	3	27	conv	No_BC	Conventional	Maize	3.15588	6.30913	9.46501	5.10832
2016	In	Mkushi	3	28	CF	No_BC	CF no residue	Maize	3.44148	6.91421	10.3557	5.6374
2016	In	Mkushi	4	36	conv	No_BC	Conventional	Maize	4.79722	6.75856	11.5558	5.56153
2016	In	Mkushi	4	41	CF	No_BC	CF normal	Maize	4.60564	7.31889	11.9245	5.80342
2016	In	Mkushi	4	42	CF	No_BC	CF no residue	Maize	5.72585	8.4415	14.1673	6.81484
2016	In	Mkushi	4	44	CF	BC	CF (NOB) + 4t/ha PP BC	Maize	4.49427	6.02923	10.5235	4.90394
2018	In	Mkushi	1	1	CF	No_BC	CF normal	Maize	5.08548	3.70082	8.71077	2.94555
2018	In	Mkushi	1	2	CF	BC	CF (NOB) + 4t/ha PP BC	Maize	4.65749	3.60011	8.1569	2.8952
2018	In	Mkushi	1	4	CF	No_BC	CF no residue	Maize	7.024	5.11065	11.9584	4.07845
2018	In	Mkushi	1	8	conv	No_BC	Conventional	Maize	3.37353	1.78747	5.11065	1.38466
2018	In	Mkushi	2	12	CF	No_BC	CF no residue	Maize	4.38056	3.52459	7.90515	2.84485
2018	In	Mkushi	2	13	CF	No_BC	CF normal	Maize	4.53161	5.00995	9.54156	4.10363
2018	In	Mkushi	2	15	CF	BC	CF (NOB) + 4t/ha PP BC	Maize	6.64636	4.15398	10.75	3.42388
2018	In	Mkushi	2	19	conv	No_BC	Conventional	Maize	4.8589	1.68677	6.52049	1.25878
2018	In	Mkushi	3	24	CF	BC	CF (NOB) + 4t/ha PP BC	Maize	6.06733	4.20433	10.2465	3.37353
2018	In	Mkushi	3	26	CF	No_BC	CF normal	Maize	5.0603	4.93442	9.94437	4.00292
2018	In	Mkushi	3	27	conv	No_BC	Conventional	Maize	4.55679	3.1973	7.80444	2.59309
2018	In	Mkushi	3	28	CF	No_BC	CF no residue	Maize	5.68969	4.43091	10.0451	3.60011
2018	In	Mkushi	4	36	conv	No_BC	Conventional	Maize	5.84075	4.35538	10.171	3.42388
2018	In	Mkushi	4	41	CF	No_BC	CF normal	Maize	4.98477	3.90222	8.83664	3.12178
2018	In	Mkushi	4	42	CF	No_BC	CF no residue	Maize	5.53864	4.53161	10.1206	3.72599
2018	In	Mkushi	4	44	CF	BC	CF (NOB) + 4t/ha PP BC	Maize	5.28688	3.1973	8.50936	2.61827

## Sheet: Sheet6
					2015-2016				2016-2017				2017-2018
					Grain		Stover		Grain		Stover		Grain		Stover		Root:shoot		Root biomass
CF(NOB) + 4t/ha PP BC				CF-BC	5.03625	0.408251	4.92619	0.300538	3.02796	0.22339	2.48103	0.26662	3.07772	0.194025	5.66452	0.436176	0.492021	0.20967	4.30136					Growing season		CF-BC	CF-NORM	CF-NO-RES	CONV
CF Normal				CF-NORM	5.17518	0.610395	4.42584	0.146734	3.3718	0.255852	2.90713	0.311704	3.54347	0.297239	4.91554	0.129752	0.3775	0.103784	3.19328					2015-16 Maize	Grain (ton ha)	5.03625	5.17518	6.07745	4.66165
Conventional				CF-NO-RES	6.07745	0.420971	5.31563	0.695948	3.59068	0.208138	3.1408	0.224565	3.56235	0.259708	5.65822	0.541069	-	-							s.e	0.408251	0.610395	0.420971	0.400806
				CONV	4.66165	0.400806	3.6826	0.377384	2.14369	0.295568	1.88998	0.244439	2.1651	0.516254	4.65749	0.508211	0.258114	0.0344253	1.76101						Stover (ton ha)	4.92619	4.42584	5.31563	3.6826
																									s.e	0.300538	0.146734	0.695948	0.377384
																								2016-17 Soya	Grain (ton ha)	3.02796	3.3718	3.59068	2.14369
																									s.e	0.22339	0.255852	0.208138	0.295568
																									Stover (ton ha)	2.48103	2.90713	3.1408	1.88998
																									s.e	0.26662	0.311704	0.224565	0.244439
																								2017-18 Maize	Grain (ton ha)	3.07772	3.54347	3.56235	2.1651
																									s.e	0.194025	0.297239	0.259708	0.516254
																									Stover (ton ha)	5.66452	4.91554	5.65822	4.65749
																									s.e	0.436176	0.129752	0.541069	0.508211
																									Root:shoot	0.492021	0.3775	-	0.258114
																									s.e	0.20967	0.103784	-	0.0344253
																									Root biomass (ton ha)*	4.30136	3.19328		1.76101
																									Max depth (cm)	22.9	23.1
																									s.e	0.6	0.4
																									Max width	19.1	18.4
																									s.e	1.1	0.8
																									Depth of max width	7.5	6.4
																									s.e	0.6	1

## Sheet: Read_me
13890 basins /ha
